# Supplementary material
Source: publisher site journal article supplement (https://www.spandidos-publications.com/1452/downloadSupplementary)

Figure S1. Overexpression of KLF6 promotes human glomerular mesangial cell proliferation. The cell proliferation in the different groups is presented. \*\* $P < 0.01$ , KLF6 vs. pcDNA3.1 group. KLF6, kruppel-like factor 6; OD, optical density.

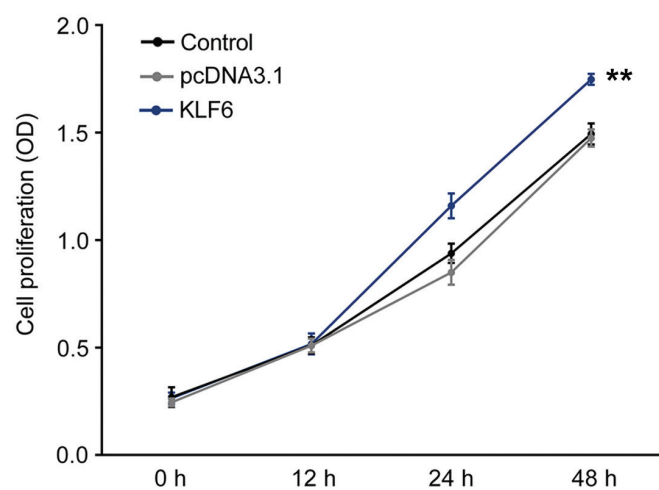

Figure S2. Overexpression of KLF6 suppresses human glomerular mesangial cell apoptosis. (A-C) Representative flow cytometry dot plots for (A) Control group, (B) pcDNA3.1 group and (C) KLF6 group. (D) The corresponding results for A-C are presented. \*\* $P < 0.01$ , KLF6 vs. pcDNA3.1 group. KLF6, kruppel-like factor 6; Q, quadrant.

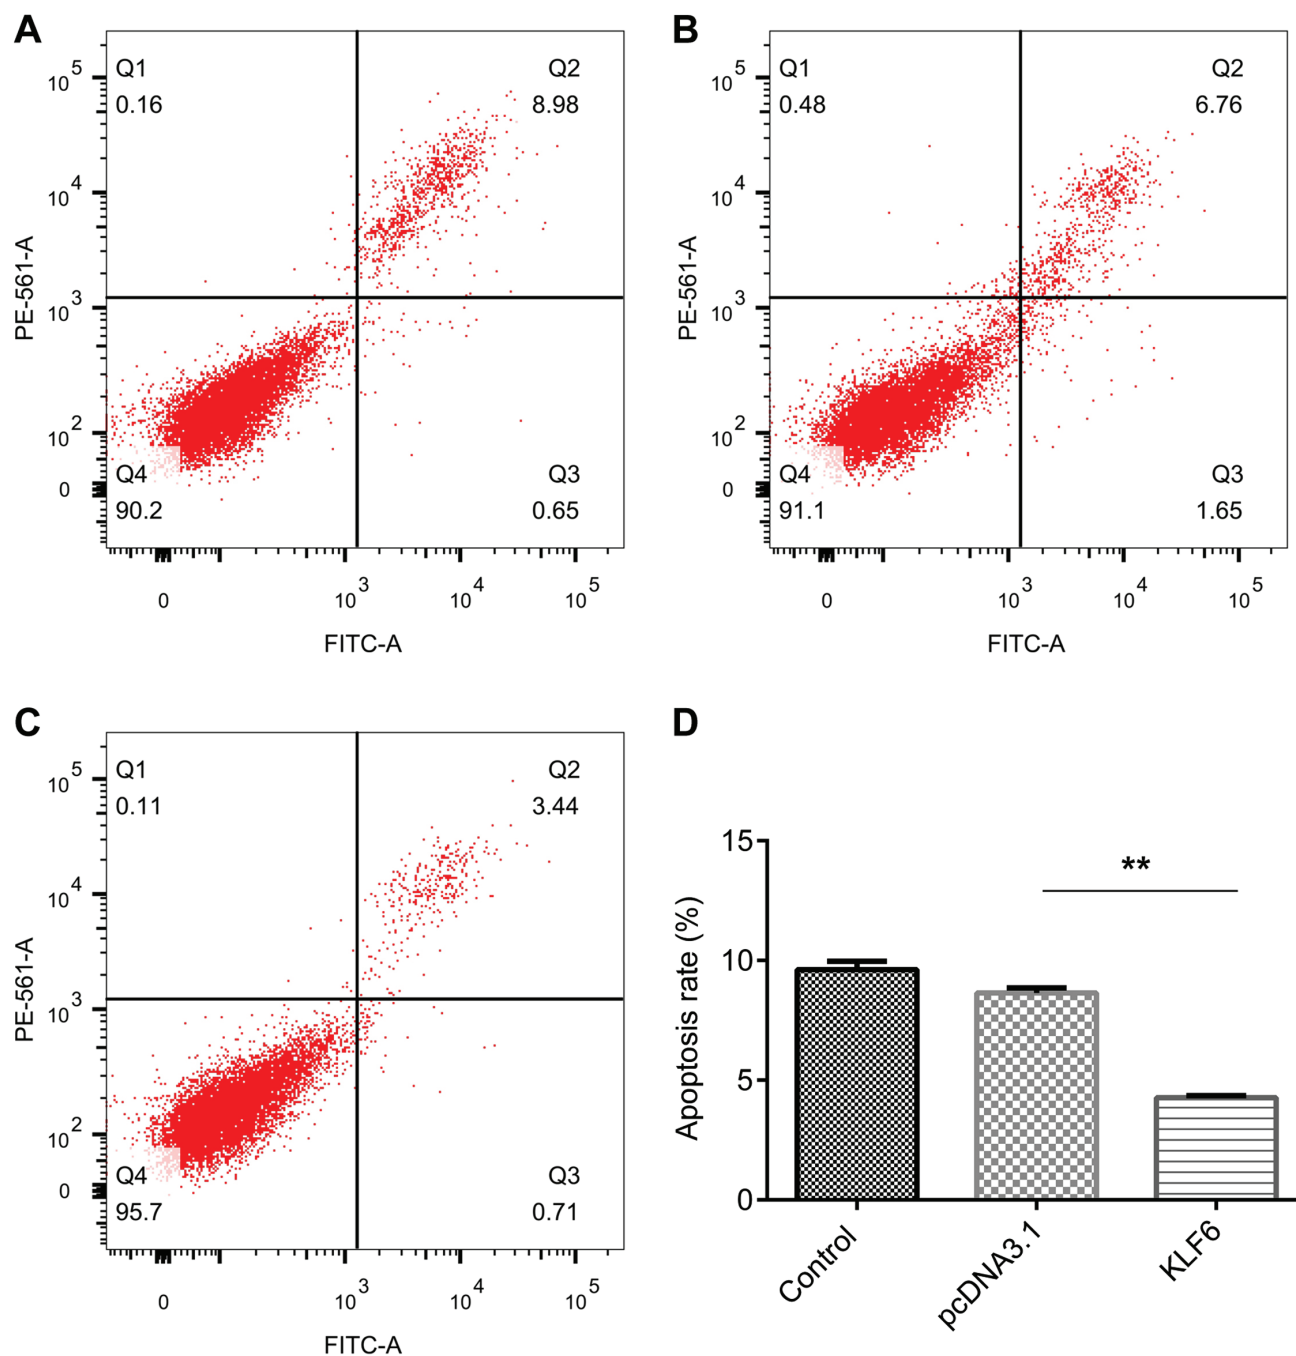

Figure S3. KLF6 may regulate human glomerular mesangial cell proliferation and apoptosis via the Wnt/ $\beta$ -catenin signaling pathway. The protein expression levels of the associated factors in different groups were assessed by western blot analysis. KLF6, kruppel-like factor 6.

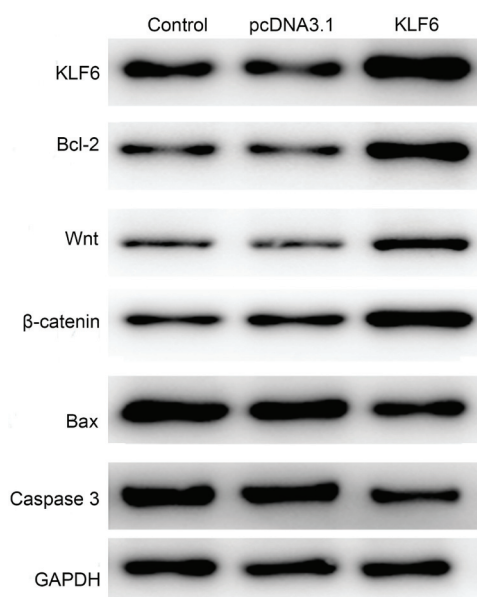

Supplement: Supplementary file 1 [file downloadSupplementary]
